# Supplementary material
Source: publisher figshare collection journal article supplement (https://karger.figshare.com/ndownloader/files/28970598)
Supplement: Supplementary file 1 [file 28970598]

| Supplementary table 4. Adjusted effects of various factors on regional brain volumes of DMN areas from stepwise regression model after excluding extreme outliers. (n=153) | | | | | | | | | | | | | | |
| --- | --- | --- | --- | --- | --- | --- | --- | --- | --- | --- | --- | --- | --- | --- |
| DMN ROI | Model 1a | | | | | | | Model 2b | | | | | | |
| R^2 | Age | | HbA1c | | CIRS-G-TS | | R^2 | Age |  | HbA1c |  | CIRS-G-SI |  |
| β(SE) | p† | β(SE) | p† | β(SE) | p† | β(SE) | p† | β(SE) | p† | β(SE) | p† |
| Hippocampus (L) | 0.17 | **-28.66(5.49)** | **<0.001*** |  |  |  |  | 0.17 | **-28.66(5.49)** | **<0.001*** |  |  |  |  |
| Hippocampus (R) | 0.17 | **-29.76(5.66)** | **<0.001*** |  |  |  |  | 0.17 | **-29.76(5.66)** | **<0.001*** |  |  |  |  |
| Medial orbitofrontal (L) | 0.02 | -14.78(8.84) | 0.117 |  |  |  |  | 0.02 | -14.78(8.84) | 0.124 |  |  |  |  |
| Medial orbitofrontal (R) | 0.05 | **-21.89(8.08)** | **0.019*** |  |  |  |  | 0.05 | **-21.89(8.08)** | **0.021*** |  |  |  |  |
| Rostral anterior cingulate (L) | 0.05 | **-19.21(6.56)** | **0.014*** |  |  |  |  | 0.05 | **-19.21(6.56)** | **0.012*** |  |  |  |  |
| Rostral anterior cingulate (R) | 0.02 | -12.5(6.59) | 0.098 |  |  |  |  | 0.02 | -12.50(6.59) | 0.101 |  |  |  |  |
| Caudal anterior cingulate (L) | 0.02 | -11.86(6.19) | 0.098 |  |  |  |  | 0.02 | -11.86(6.19) | 0.101 |  |  |  |  |
| Caudal anterior cingulate (R) | 0.02 | -10.82(6.40) | 0.117 |  |  |  |  | 0.02 | -10.82(6.40) | 0.124 |  |  |  |  |
| Posterior cingulate (L) | 0.06 | -9.35(5.31) | 0.115 | 72.36(39.29) | 0.104 | -13.27(6.11) | 0.065 | 0.02 | -9.17(5.34) | 0.124 |  |  |  |  |
| Posterior cingulate (R) | 0.06 | **-16.69(5.57)** | **0.014*** |  |  |  |  | 0.06 | **-16.69(5.57)** | **0.012*** |  |  |  |  |
| Isthmus (L) | 0.02 |  |  |  |  |  |  | 0.02 |  |  |  |  |  |  |
| Isthmus (R) | 0.10 | **-15.43(4.09)** | **0.002*** |  |  |  |  | 0.10 | **-15.43(4.09)** | **0.002*** |  |  |  |  |
| Precuneus (L) | 0.06 | **-35.30(11.65)** | **0.014*** |  |  |  |  | 0.06 | **-35.30(11.65)** | **0.012*** |  |  |  |  |
| Precuneus (R) | 0.08 | **-33.75(11.65)** | **0.014*** |  |  |  |  | 0.12 | **-28.58(11.67)** | **0.038*** |  |  | **-263.92(110.45)** | **0.040*** |
| Supramarginal (L) | 0.02 | -40.10(23.70) | 0.117 |  |  |  |  | 0.02 | -40.10(23.70) | 0.124 |  |  |  |  |
| Supramarginal (R) | 0.09 | **-42.05(15.91)** | **0.021*** |  |  | **-48.27(17.71)** | **0.019*** | 0.12 | -34.22(15.91) | 0.066 |  |  | **-537.63(149.87)** | **0.002*** |
| Abbreviations: DMN, default mode network; ROI, region of interest; L, left hemisphere; R, right hemisphere; β, unstandardized regression coefficient; SE, standard error. a Stepwise regression model: Dependent variable: regional volume of each area in DMN. Covariates include age, gender, BMI, years of education, CIRS-G-TS, and HbA1c.  b Stepwise regression model: Dependent variable: regional volume of each area in DMN. Covariates include age, gender, BMI, years of education, CIRS-G-SI, and HbA1c.  † Adjusted p-value via Benjamini-Hochberg procedure. * p<.05 | | | | | | | | | | | | | | |
|  |
|  |
|  |
|  |
